# Supplementary material for: A highly efficient and recyclable cobalt ferrite chitosan sulfonic acid magnetic nanoparticle for one-pot, four-component synthesis of 2H-indazolo[2,1-b]phthalazine-triones
Source: Royal Society of Chemistry journal article supplement (doi:10.1039/c4ra09984b), 2014-01-01

## A highly efficient and recyclable cobalt ferrite chitosan sulfonic acid magnetic nanoparticle for one-pot, four-component synthesis of 2*H*-indazolo[2,1-*b*]phthalazine-triones

Xiao-Na Zhao, Guo-Fei Hu, Meng Tang, Tai-Tai Shi, Xiao-Li Guo, Tao-Tao Li, Zhan-Hui Zhang\*

College of Chemistry and Material Science, Hebei Normal University, Shijiazhuang 050024, China

E-mail: zhanhui@126.com; Fax: +86 31180787431

### Table of Contents

Copies of <sup>1</sup>H and <sup>13</sup>C NMR spectra for products **5c-5e**, **5g**, **5u** and **5v** S2 –S7

<sup>1</sup>H NMR and <sup>13</sup>C NMR of compound **5c**

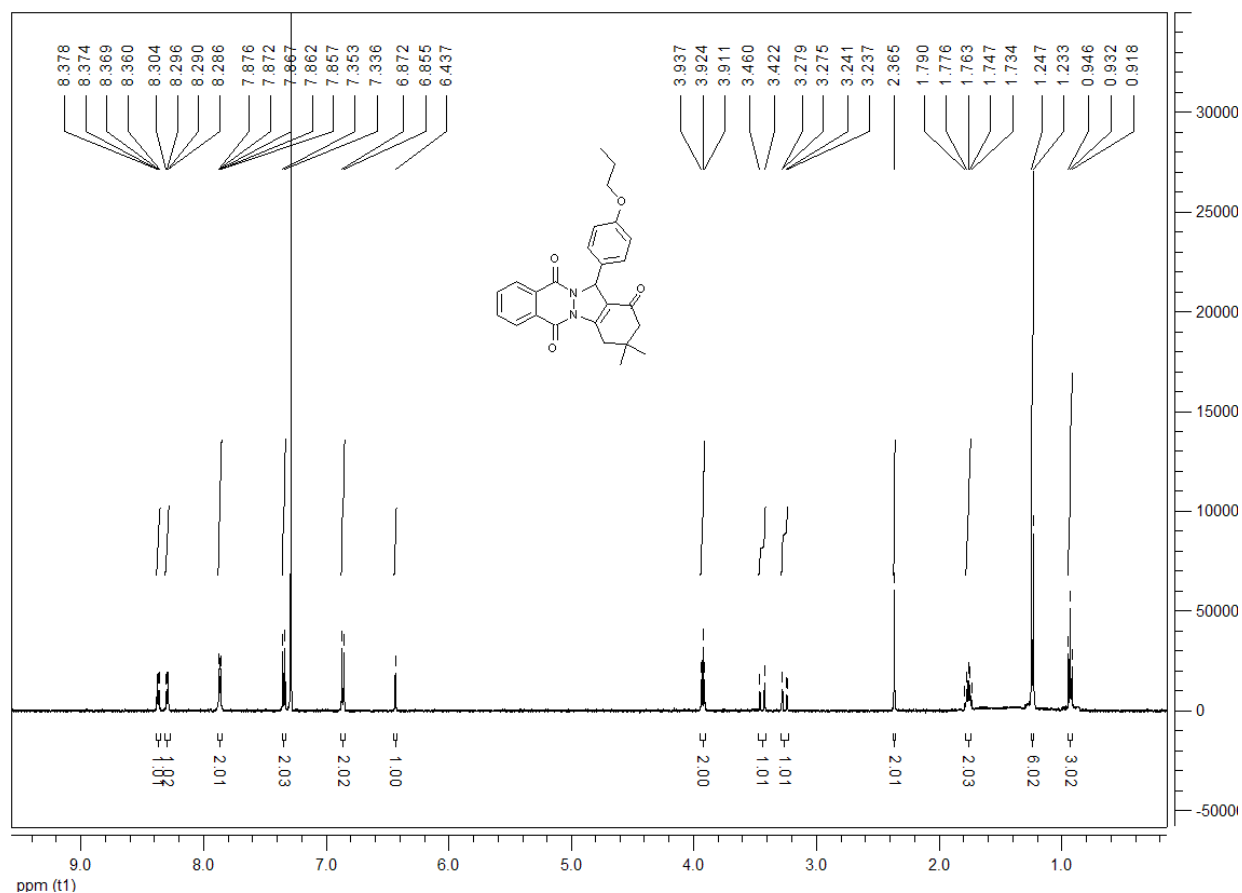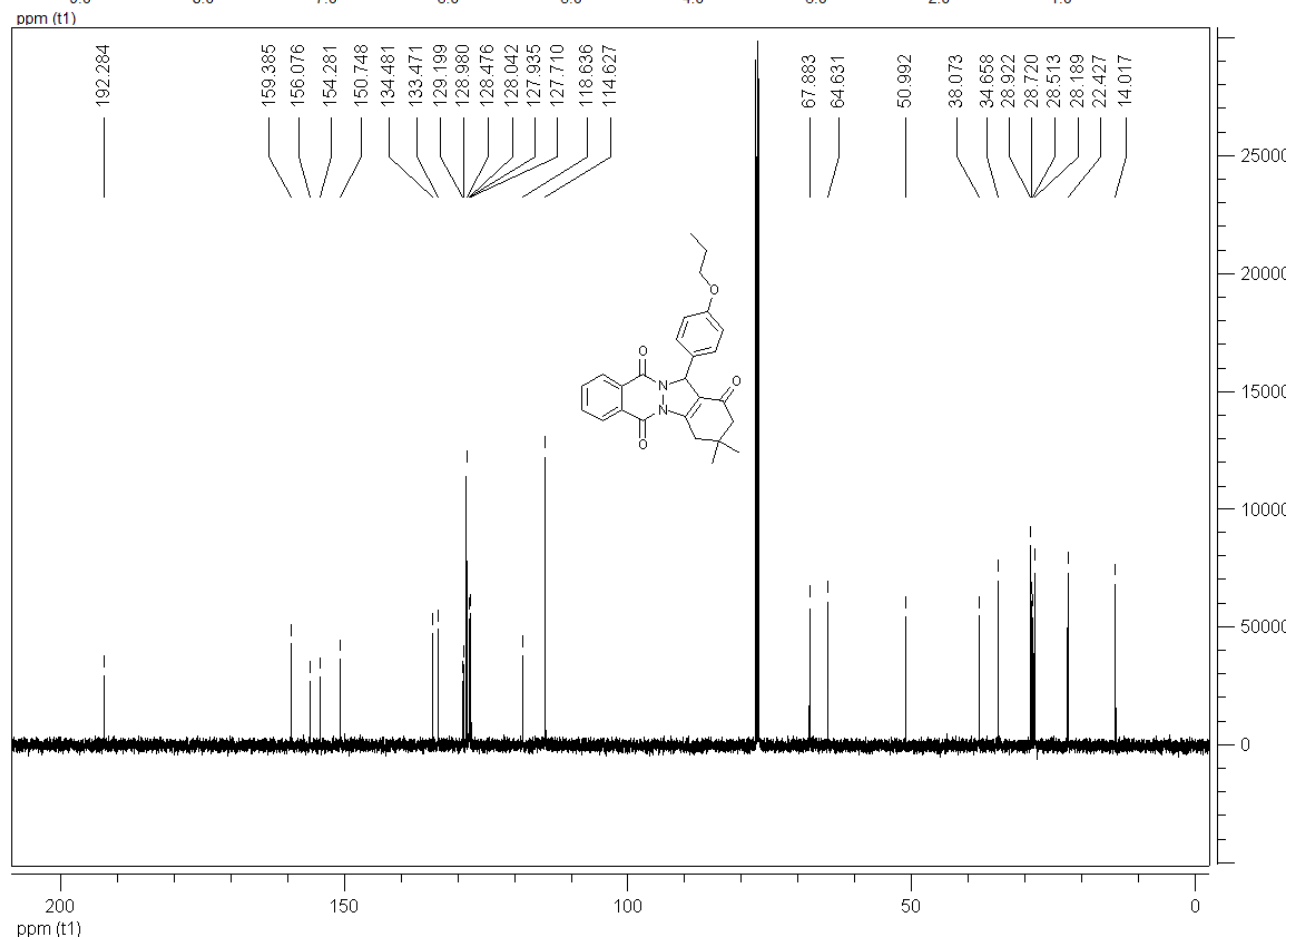

$^1\text{H}$  NMR and  $^{13}\text{C}$  NMR of compound **5d**

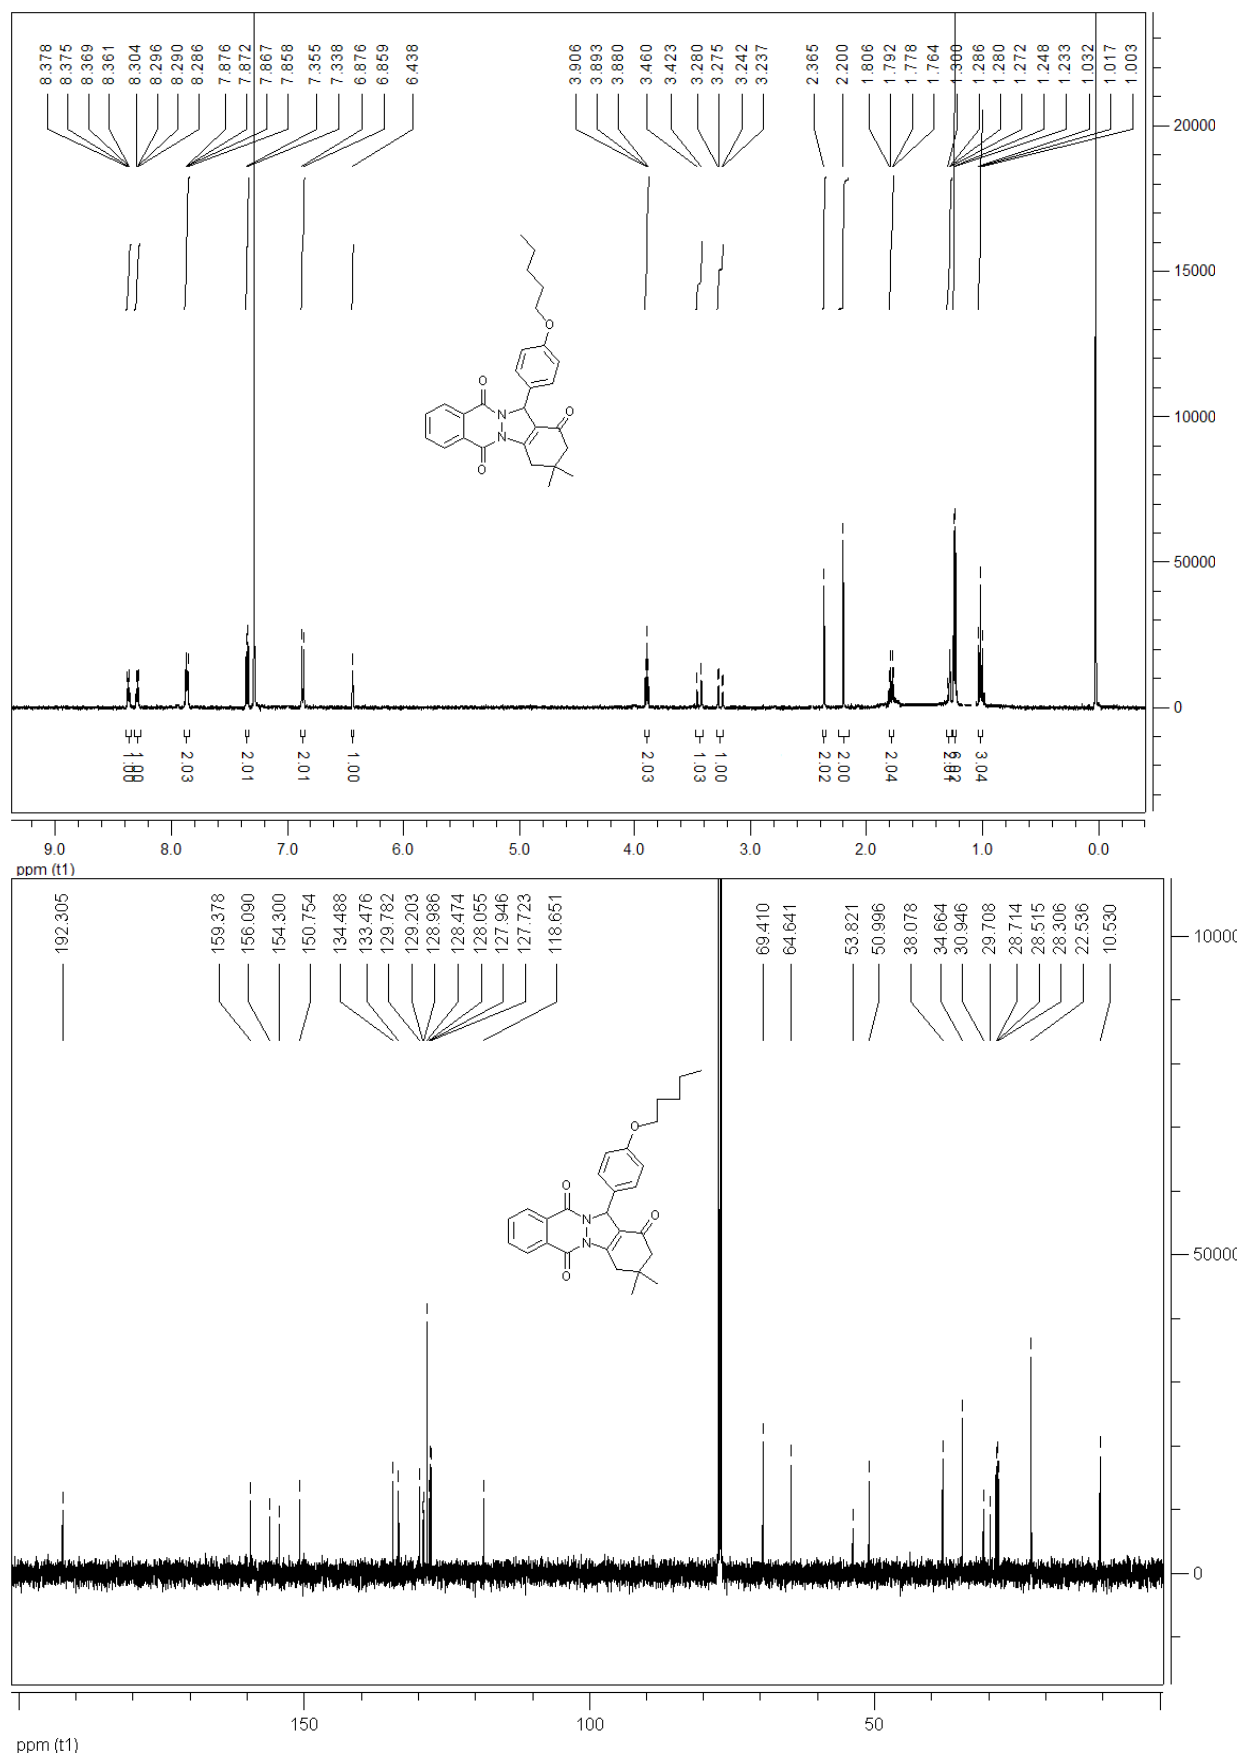

<sup>1</sup>H NMR and <sup>13</sup>C NMR of compound **5e**

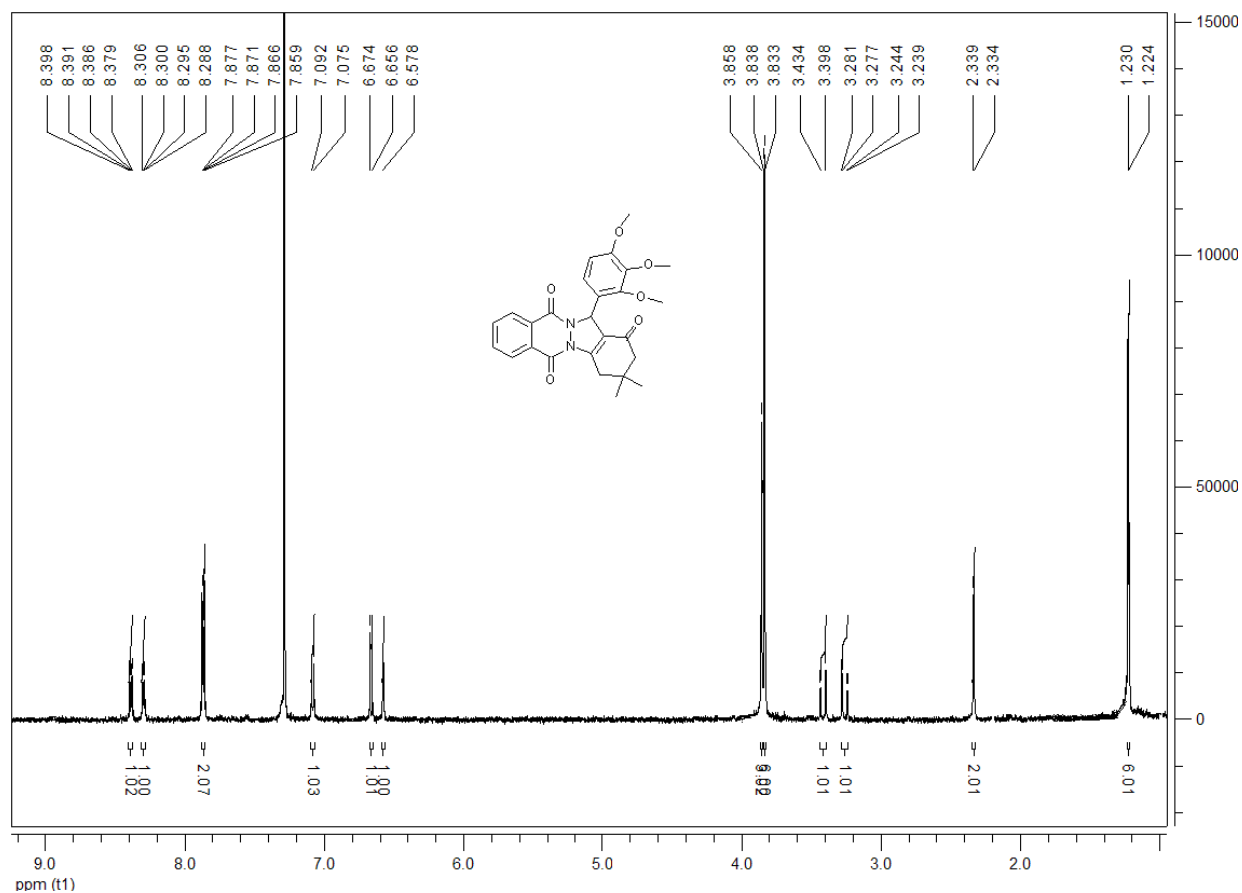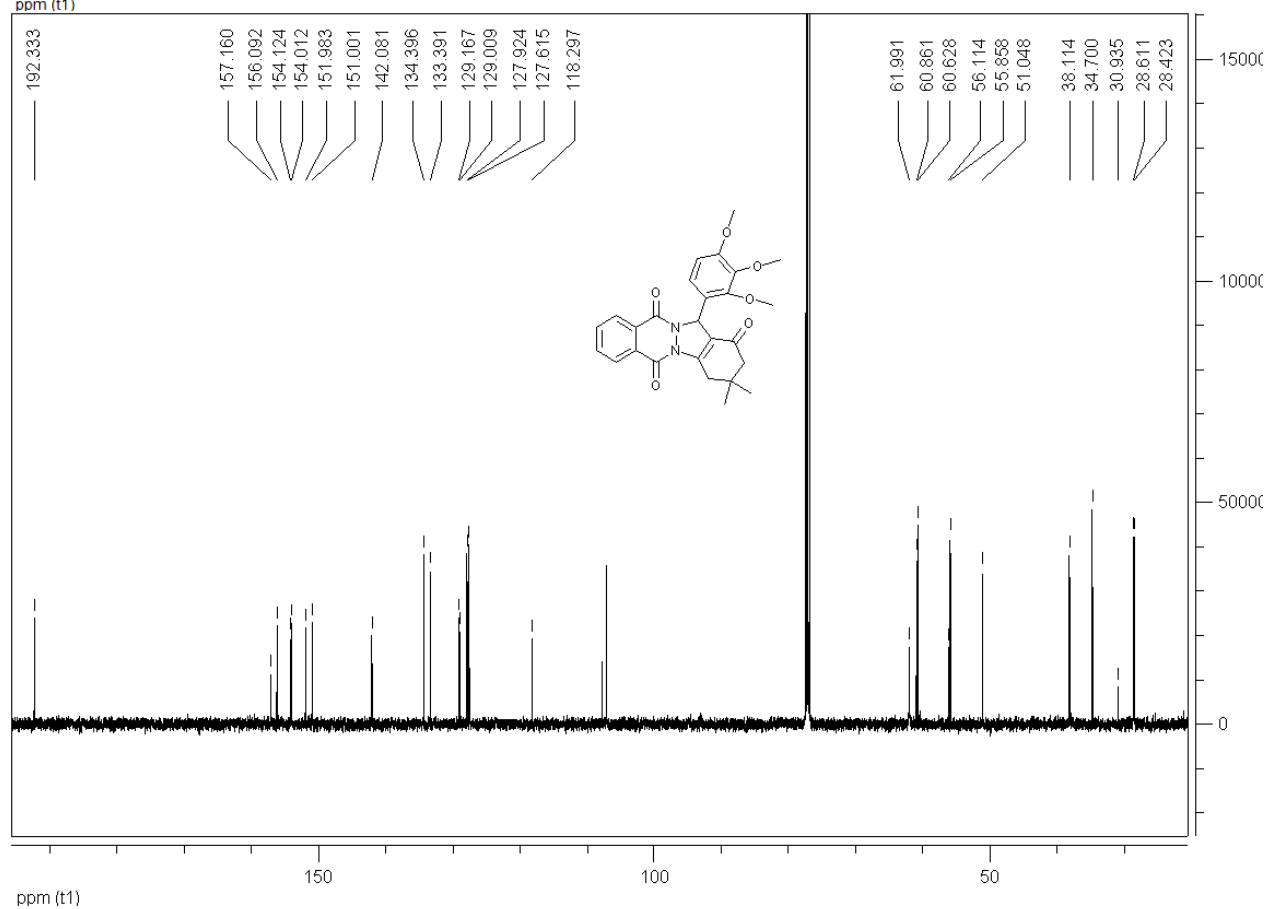

$^1\text{H}$  NMR and  $^{13}\text{C}$  NMR of compound **5g**

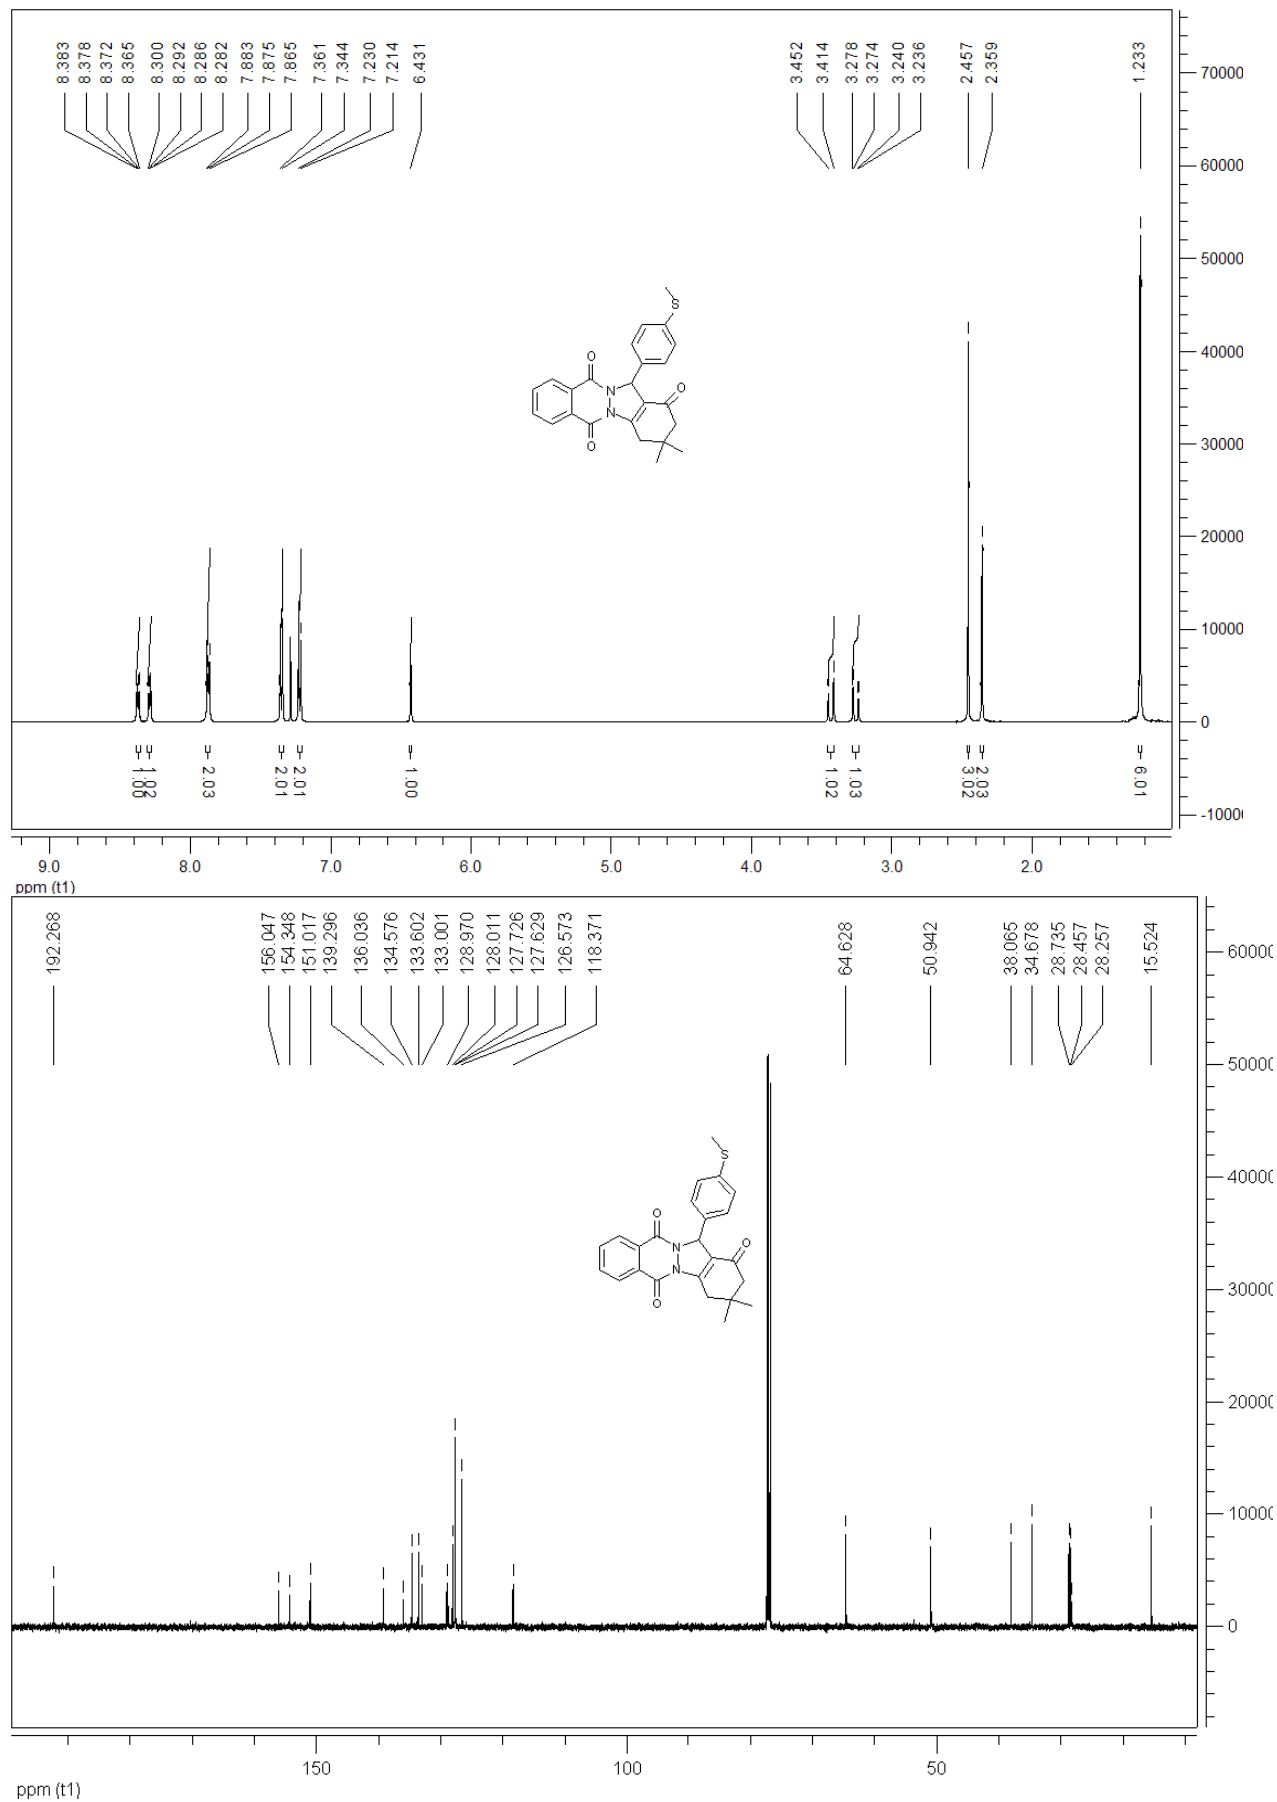

<sup>1</sup>H NMR and <sup>13</sup>C NMR of compound **5u**

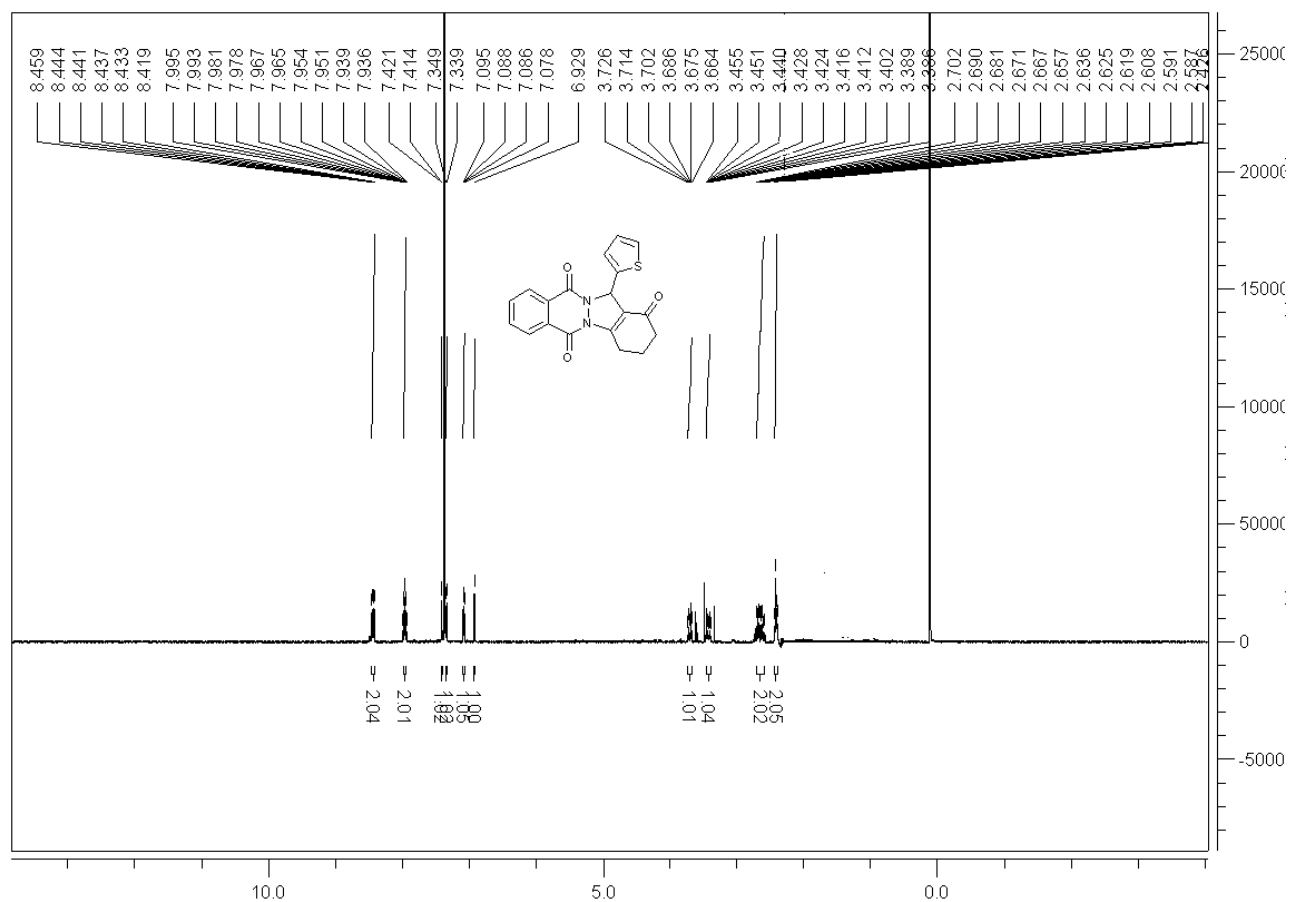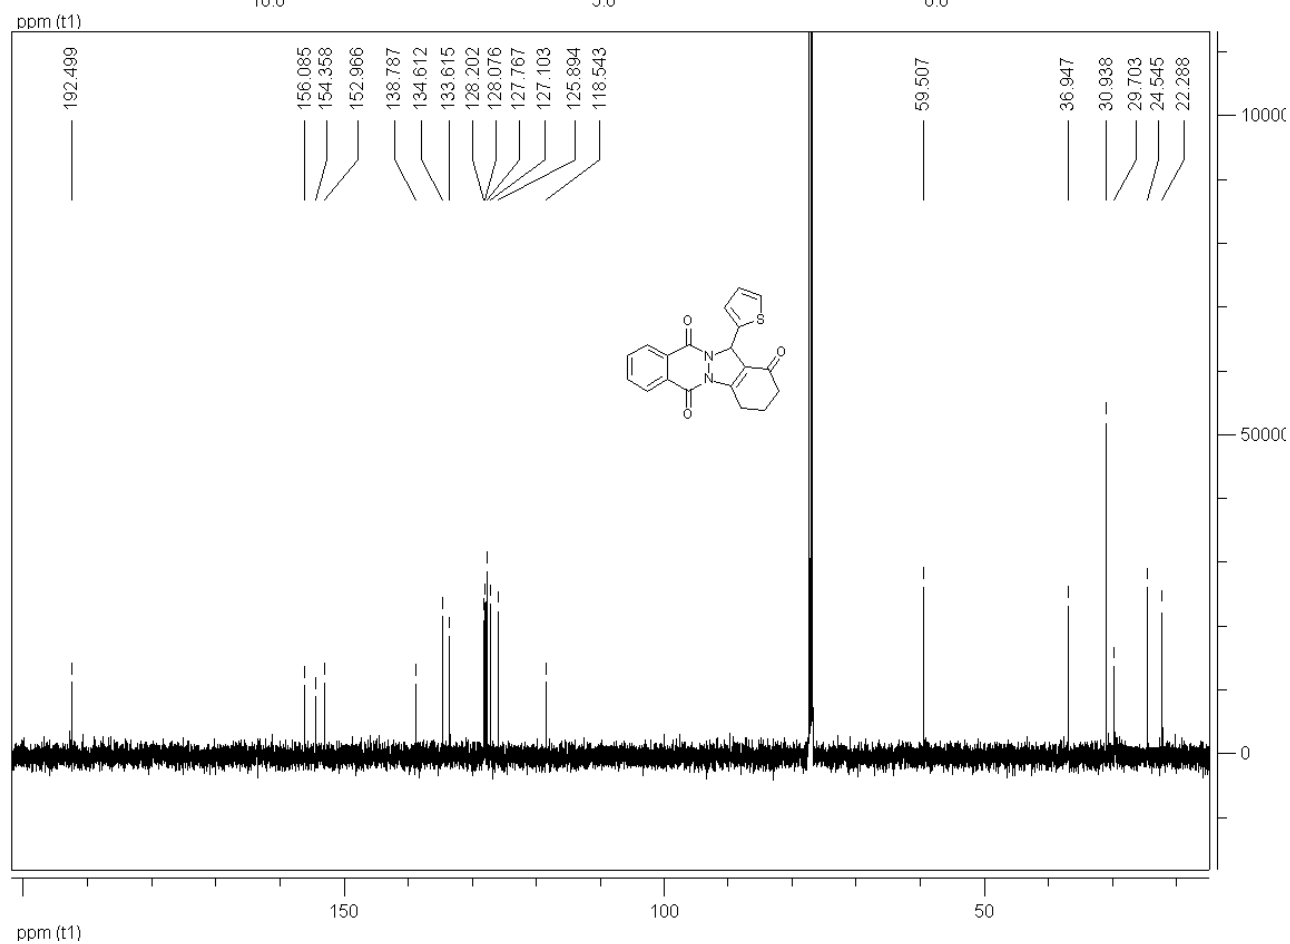

<sup>1</sup>H NMR and <sup>13</sup>C NMR of compound **5v**

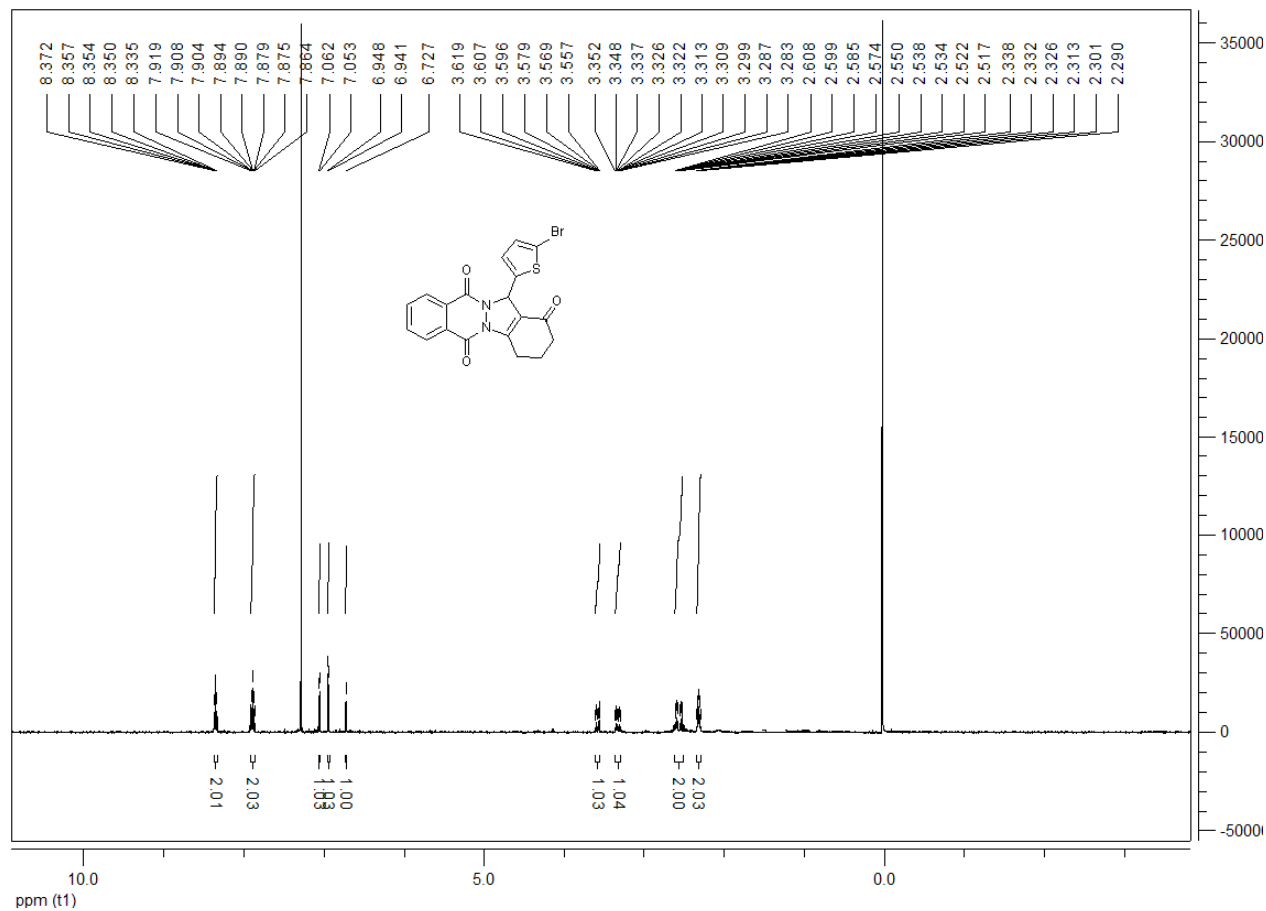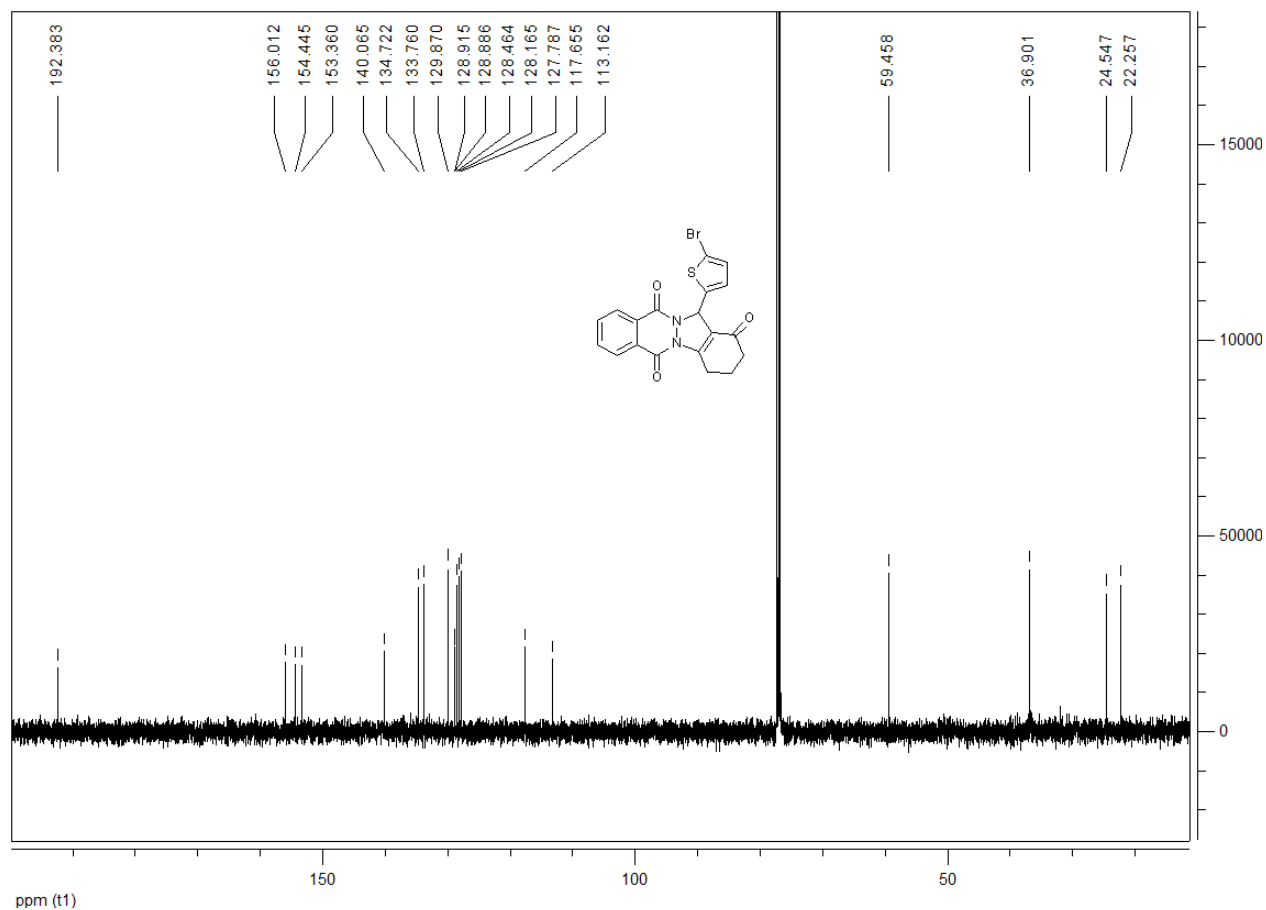

Supplement: c4ra09984b1.pdf [file c4ra09984b1.pdf]
